# Supplementary material for: The isolation and identification of pathogenic fungi from Tessaratoma papillosa Drury (Hemiptera: Tessaratomidae)
Source: PubMed Central journal article supplement (PMC5633030; doi:10.7717/peerj.3888), 2017-10-06
Supplement: peerj-05-3888-s003.pdf [file peerj-05-3888-s003.pdf]

the mortality results by two method (SPSS,DPS)

Corrected mortality

|                   |                 | mortality(from raw data) |     |       |       |
|-------------------|-----------------|--------------------------|-----|-------|-------|
|                   |                 | repetition               |     |       |       |
|                   |                 | 1                        | 2   | 3     |       |
| <i>P. lilacim</i> | 2nd instar nym  | 1                        | 90  | 77.78 | 66.67 |
|                   | 5th instar nymp | 2                        | 80  | 60    | 66.67 |
|                   | adult           | 3                        | 60  | 70    | 60    |
| <i>B. bassiar</i> | 2nd instar nym  | 4                        | 100 | 77.78 | 88.89 |
|                   | 5th instar nymp | 5                        | 80  | 66.67 | 80    |
|                   | adult           | 6                        | 60  | 66.67 | 70    |

SPSS17.0

描述

VAR00002

|      | N  | 均值      | 标准差      | 标准误     | 均值的 95% 置信区间 |          | 极小值   | 极大值    | 分单间方差    |
|------|----|---------|----------|---------|--------------|----------|-------|--------|----------|
|      |    |         |          |         | 下限           | 上限       |       |        |          |
| 1.00 | 3  | 78.1481 | 11.67108 | 6.73830 | 49.1556      | 107.1407 | 66.67 | 90.00  |          |
| 2.00 | 3  | 68.8889 | 10.18350 | 5.87945 | 43.5917      | 94.1861  | 60.00 | 80.00  |          |
| 3.00 | 3  | 63.3333 | 5.77350  | 3.33333 | 48.9912      | 77.6755  | 60.00 | 70.00  |          |
| 4.00 | 3  | 88.8889 | 11.11111 | 6.41500 | 61.2874      | 116.4904 | 77.78 | 100.00 |          |
| 5.00 | 3  | 75.5556 | 7.69800  | 4.44444 | 56.4327      | 94.6785  | 66.67 | 80.00  |          |
| 6.00 | 3  | 65.5556 | 5.09175  | 2.93972 | 52.9069      | 78.2042  | 60.00 | 70.00  |          |
| 总数   | 18 | 73.3951 | 11.66883 | 2.75037 | 67.5923      | 79.1978  | 60.00 | 100.00 |          |
| 模型   |    |         |          |         |              |          |       |        |          |
| 固定效应 |    |         | 8.96189  | 2.11234 | 68.7927      | 77.9975  |       |        |          |
| 随机效应 |    |         |          | 3.87436 | 63.4357      | 83.3544  |       |        | 63.29218 |

ANOVA

VAR00002

|         | 平方和      | df | 均方      | F     | 显著性  |
|---------|----------|----|---------|-------|------|
| 组间 (组合) | 1350.960 | 5  | 270.192 | 3.364 | .039 |
| 线性项 对比  | 12.986   | 1  | 12.986  | .162  | .695 |
| 偏差      | 1337.974 | 4  | 334.493 | 4.165 | .024 |
| 组内      | 963.786  | 12 | 80.316  |       |      |
| 总数      | 2314.746 | 17 |         |       |      |

多重比较

因变量:VAR00002

|     | (I) VAR00001 | (J) VAR00001 | 均值差 (I-J) | 标准误     | 显著性  | 95% 置信区间 |         |
|-----|--------------|--------------|-----------|---------|------|----------|---------|
|     |              |              |           |         |      | 下限       | 上限      |
| LSD | 1.00         | 2.00         | 9.25926   | 7.31735 | .230 | -6.6839  | 25.2024 |
|     |              | 3.00         | 14.81481  | 7.31735 | .066 | -1.1283  | 30.7580 |
|     |              | 4.00         | -10.74074 | 7.31735 | .168 | -26.6839 | 5.2024  |
|     |              | 5.00         | 2.59259   | 7.31735 | .729 | -13.3506 | 18.5357 |
|     |              | 6.00         | 12.59259  | 7.31735 | .111 | -3.3506  | 28.5357 |
|     | 2.00         | 1.00         | -9.25926  | 7.31735 | .230 | -25.2024 | 6.6839  |
|     |              | 3.00         | 5.55556   | 7.31735 | .462 | -10.3876 | 21.4987 |

|      |      |                        |         |      |          |         |
|------|------|------------------------|---------|------|----------|---------|
|      | 4.00 | -20.00000 <sup>*</sup> | 7.31735 | .018 | -35.9431 | -4.0569 |
|      | 5.00 | -6.66667               | 7.31735 | .380 | -22.6098 | 9.2765  |
|      | 6.00 | 3.33333                | 7.31735 | .657 | -12.6098 | 19.2765 |
| 3.00 | 1.00 | -14.81481              | 7.31735 | .066 | -30.7580 | 1.1283  |
|      | 2.00 | -5.55556               | 7.31735 | .462 | -21.4987 | 10.3876 |
|      | 4.00 | -25.55556 <sup>*</sup> | 7.31735 | .004 | -41.4987 | -9.6124 |
|      | 5.00 | -12.22222              | 7.31735 | .121 | -28.1654 | 3.7209  |
|      | 6.00 | -2.22222               | 7.31735 | .767 | -18.1654 | 13.7209 |
| 4.00 | 1.00 | 10.74074               | 7.31735 | .168 | -5.2024  | 26.6839 |
|      | 2.00 | 20.00000 <sup>*</sup>  | 7.31735 | .018 | 4.0569   | 35.9431 |
|      | 3.00 | 25.55556 <sup>*</sup>  | 7.31735 | .004 | 9.6124   | 41.4987 |
|      | 5.00 | 13.33333               | 7.31735 | .093 | -2.6098  | 29.2765 |
|      | 6.00 | 23.33333 <sup>*</sup>  | 7.31735 | .008 | 7.3902   | 39.2765 |
| 5.00 | 1.00 | -2.59259               | 7.31735 | .729 | -18.5357 | 13.3506 |
|      | 2.00 | 6.66667                | 7.31735 | .380 | -9.2765  | 22.6098 |
|      | 3.00 | 12.22222               | 7.31735 | .121 | -3.7209  | 28.1654 |
|      | 4.00 | -13.33333              | 7.31735 | .093 | -29.2765 | 2.6098  |
|      | 6.00 | 10.00000               | 7.31735 | .197 | -5.9431  | 25.9431 |
| 6.00 | 1.00 | -12.59259              | 7.31735 | .111 | -28.5357 | 3.3506  |
|      | 2.00 | -3.33333               | 7.31735 | .657 | -19.2765 | 12.6098 |
|      | 3.00 | 2.22222                | 7.31735 | .767 | -13.7209 | 18.1654 |
|      | 4.00 | -23.33333 <sup>*</sup> | 7.31735 | .008 | -39.2765 | -7.3902 |
|      | 5.00 | -10.00000              | 7.31735 | .197 | -25.9431 | 5.9431  |

DPS

|      |                            |         |          |        |                  |  |  |
|------|----------------------------|---------|----------|--------|------------------|--|--|
| 计算结果 | 当前日期 2017-8-23 PM 12:06:14 |         |          |        |                  |  |  |
| 处理   | 样本数                        | 均值      | 标准差      | 标准误    | 95%置信区间          |  |  |
| 1    | 3                          | 78.15   | 11.6694  | 6.7373 | 49.1616 107.1384 |  |  |
| 2    | 3                          | 68.89   | 10.1831  | 5.8792 | 43.5937 94.1863  |  |  |
| 3    | 3                          | 63.3333 | 5.7735   | 3.3333 | 48.9912 77.6755  |  |  |
| 4    | 3                          | 88.89   | 11.11    | 6.4144 | 61.2912 116.4888 |  |  |
| 5    | 3                          | 75.5567 | 7.6961   | 4.4433 | 56.4385 94.6748  |  |  |
| 6    | 3                          | 65.5567 | 5.0921   | 2.9399 | 52.9072 78.2062  |  |  |
|      | 方差分析表                      |         |          |        |                  |  |  |
| 变异来源 | 平方和                        | 自由度     | 均方       | F 值    | p值               |  |  |
| 处理间  | 1351.0484                  | 5       | 270.2097 | 3.365  | 0.0395           |  |  |
| 处理内  | 963.5919                   | 12      | 80.2993  |        |                  |  |  |
| 总变异  | 2314.6403                  | 17      |          |        |                  |  |  |



average mortality

|                    |            |       | mortality(from raw data) |     |    |    |
|--------------------|------------|-------|--------------------------|-----|----|----|
|                    |            |       | repetition               |     |    |    |
|                    |            |       | 1                        | 2   | 3  |    |
| <i>P. lilacini</i> | 2nd instar | nymph | 1                        | 90  | 80 | 70 |
|                    | 5th instar | nymph | 2                        | 80  | 60 | 70 |
|                    | adult      |       | 3                        | 60  | 70 | 60 |
| <i>B. bassiar</i>  | 2nd instar | nymph | 4                        | 100 | 80 | 90 |
|                    | 5th instar | nymph | 5                        | 80  | 70 | 80 |
|                    | adult      |       | 6                        | 60  | 70 | 70 |

SPSS17.0

VAR00002

|      | N  | 均值      | 标准差      | 标准误     | 均值的 95% 置信区间 |          | 极小值   | 极大值    | 分量间方差    |
|------|----|---------|----------|---------|--------------|----------|-------|--------|----------|
|      |    |         |          |         | 下限           | 上限       |       |        |          |
| 1.00 | 3  | 80.0000 | 10.00000 | 5.77350 | 55.1586      | 104.8414 | 70.00 | 90.00  |          |
| 2.00 | 3  | 70.0000 | 10.00000 | 5.77350 | 45.1586      | 94.8414  | 60.00 | 80.00  |          |
| 3.00 | 3  | 63.3333 | 5.77350  | 3.33333 | 48.9912      | 77.6755  | 60.00 | 70.00  |          |
| 4.00 | 3  | 90.0000 | 10.00000 | 5.77350 | 65.1586      | 114.8414 | 80.00 | 100.00 |          |
| 5.00 | 3  | 76.6667 | 5.77350  | 3.33333 | 62.3245      | 91.0088  | 70.00 | 80.00  |          |
| 6.00 | 3  | 66.6667 | 5.77350  | 3.33333 | 52.3245      | 81.0088  | 60.00 | 70.00  |          |
| 总数   | 18 | 74.4444 | 11.49026 | 2.70828 | 68.7305      | 80.1584  | 60.00 | 100.00 |          |
| 模型   |    |         | 8.16497  | 1.92450 | 70.2513      | 78.6376  |       |        |          |
| 随机效应 |    |         |          | 4.00617 | 64.1463      | 84.7426  |       |        | 74.07407 |

ANOVA

VAR00002

|         | 平方和      | df | 均方      | F     | 显著性  |
|---------|----------|----|---------|-------|------|
| 组间 (组合) | 1444.444 | 5  | 288.889 | 4.333 | .017 |
| 线性项     | 17.143   | 1  | 17.143  | .257  | .621 |
| 对比      | 1427.302 | 4  | 356.825 | 5.352 | .010 |
| 组内      | 800.000  | 12 | 66.667  |       |      |
| 总数      | 2244.444 | 17 |         |       |      |

多重比较

因变量:VAR00002

|     | (I) VAR00001 | (J) VAR00001 | 均值差 (I-J) | 标准误       | 显著性     | 95% 置信区间 |          |
|-----|--------------|--------------|-----------|-----------|---------|----------|----------|
|     |              |              |           |           |         | 下限       | 上限       |
| LSD | 1.00         | 2.00         | 10.00000  | 6.66667   | .159    | -4.5254  | 24.5254  |
|     |              | 3.00         | 16.66667* | 6.66667   | .028    | 2.1412   | 31.1921  |
|     |              | 4.00         | -10.00000 | 6.66667   | .159    | -24.5254 | 4.5254   |
|     |              | 5.00         | 3.33333   | 6.66667   | .626    | -11.1921 | 17.8588  |
|     |              | 6.00         | 13.33333  | 6.66667   | .069    | -1.1921  | 27.8588  |
|     |              | 2.00         | 1.00      | -10.00000 | 6.66667 | .159     | -24.5254 |
|     |              | 3.00         | 6.66667   | 6.66667   | .337    | -7.8588  | 21.1921  |

|         |      |                        |          |         |          |          |         |
|---------|------|------------------------|----------|---------|----------|----------|---------|
|         | 4.00 | -20.00000 <sup>*</sup> | 6.66667  | .011    | -34.5254 | -5.4746  |         |
|         | 5.00 | -6.66667               | 6.66667  | .337    | -21.1921 | 7.8588   |         |
|         | 6.00 | 3.33333                | 6.66667  | .626    | -11.1921 | 17.8588  |         |
| 3.00    | 1.00 | -16.66667 <sup>*</sup> | 6.66667  | .028    | -31.1921 | -2.1412  |         |
|         | 2.00 | -6.66667               | 6.66667  | .337    | -21.1921 | 7.8588   |         |
|         | 4.00 | -26.66667 <sup>*</sup> | 6.66667  | .002    | -41.1921 | -12.1412 |         |
|         | 5.00 | -13.33333              | 6.66667  | .069    | -27.8588 | 1.1921   |         |
|         | 6.00 | -3.33333               | 6.66667  | .626    | -17.8588 | 11.1921  |         |
| 4.00    | 1.00 | 10.00000               | 6.66667  | .159    | -4.5254  | 24.5254  |         |
|         | 2.00 | 20.00000 <sup>*</sup>  | 6.66667  | .011    | 5.4746   | 34.5254  |         |
|         | 3.00 | 26.66667 <sup>*</sup>  | 6.66667  | .002    | 12.1412  | 41.1921  |         |
|         | 5.00 | 13.33333               | 6.66667  | .069    | -1.1921  | 27.8588  |         |
|         | 6.00 | 23.33333 <sup>*</sup>  | 6.66667  | .004    | 8.8079   | 37.8588  |         |
| 5.00    | 1.00 | -3.33333               | 6.66667  | .626    | -17.8588 | 11.1921  |         |
|         | 2.00 | 6.66667                | 6.66667  | .337    | -7.8588  | 21.1921  |         |
|         | 3.00 | 13.33333               | 6.66667  | .069    | -1.1921  | 27.8588  |         |
|         | 4.00 | -13.33333              | 6.66667  | .069    | -27.8588 | 1.1921   |         |
|         | 6.00 | 10.00000               | 6.66667  | .159    | -4.5254  | 24.5254  |         |
| 6.00    | 1.00 | -13.33333              | 6.66667  | .069    | -27.8588 | 1.1921   |         |
|         | 2.00 | -3.33333               | 6.66667  | .626    | -17.8588 | 11.1921  |         |
|         | 3.00 | 3.33333                | 6.66667  | .626    | -11.1921 | 17.8588  |         |
|         | 4.00 | -23.33333 <sup>*</sup> | 6.66667  | .004    | -37.8588 | -8.8079  |         |
|         | 5.00 | -10.00000              | 6.66667  | .159    | -24.5254 | 4.5254   |         |
| Tamhane | 1.00 | 2.00                   | 10.00000 | 8.16497 | .994     | -40.7354 | 60.7354 |
|         |      | 3.00                   | 16.66667 | 6.66667 | .725     | -35.6241 | 68.9574 |

DPS

|      |                                      |         |          |        |             |          |  |
|------|--------------------------------------|---------|----------|--------|-------------|----------|--|
| 计算结果 | 当前日期<br>2017-8-<br>23 PM<br>12:17:23 |         |          |        |             |          |  |
| 处理   | 样本数                                  | 均值      | 标准差      | 标准误    | 95%置信<br>区间 |          |  |
| 1    | 3                                    | 80      | 10       | 5.7735 | 55.1586     | 104.8414 |  |
| 2    | 3                                    | 70      | 10       | 5.7735 | 45.1586     | 94.8414  |  |
| 3    | 3                                    | 63.3333 | 5.7735   | 3.3333 | 48.9912     | 77.6755  |  |
| 4    | 3                                    | 90      | 10       | 5.7735 | 65.1586     | 114.8414 |  |
| 5    | 3                                    | 76.6667 | 5.7735   | 3.3333 | 62.3245     | 91.0088  |  |
| 6    | 3                                    | 66.6667 | 5.7735   | 3.3333 | 52.3245     | 81.0088  |  |
|      | 方差分析<br>表                            |         |          |        |             |          |  |
| 变异来源 | 平方和                                  | 自由度     | 均方       | F 值    | p值          |          |  |
| 处理间  | 1444.444                             | 5       | 288.8889 | 4.333  | 0.0174      |          |  |
| 处理内  | 800                                  | 12      | 66.6667  |        |             |          |  |
| 总变异  | 2244.444                             | 17      |          |        |             |          |  |

|                                 |         |         |         |         |        |        |        |
|---------------------------------|---------|---------|---------|---------|--------|--------|--------|
|                                 |         |         |         |         |        |        |        |
| LSD法多重比较<br>(下三角为均值差, 上三角为显著水平) |         |         |         |         |        |        |        |
| No.                             | 均值      | 4       | 1       | 5       | 2      | 6      | 3      |
| 4                               | 90      |         | 0.1595  | 0.0687  | 0.0111 | 0.0044 | 0.0018 |
| 1                               | 80      | 10      |         | 0.6261  | 0.1595 | 0.0687 | 0.0279 |
| 5                               | 76.6667 | 13.3333 | 3.3333  |         | 0.337  | 0.1595 | 0.0687 |
| 2                               | 70      | 20      | 10      | 6.6667  |        | 0.6261 | 0.337  |
| 6                               | 66.6667 | 23.3333 | 13.3333 | 10      | 3.3333 |        | 0.6261 |
| 3                               | 63.3333 | 26.6667 | 16.6667 | 13.3333 | 6.6667 | 3.3333 |        |
| 字母标记表示结果                        |         |         |         |         |        |        |        |
| 处理                              | 均值      | 5%显著水平  |         | 1%极显著水平 |        |        |        |
| 4                               | 90      | a       |         | A       |        |        |        |
| 1                               | 80      | ab      |         | AB      |        |        |        |
| 5                               | 76.6667 | abc     |         | AB      |        |        |        |
| 2                               | 70      | bc      |         | AB      |        |        |        |
| 6                               | 66.6667 | bc      |         | B       |        |        |        |
| 3                               | 63.3333 | c       |         | B       |        |        |        |
|                                 |         |         |         |         |        |        |        |
|                                 |         |         |         |         |        |        |        |

|
